# Supplementary material for: A Linear Diubiquitin-Based Probe for Efficient and Selective Detection of the Deubiquitinating Enzyme OTULIN
Source: PubMed Central journal article supplement (PMC5658516; doi:10.1016/j.chembiol.2017.08.006), 2017-10-19
Supplement: mmc1.pdf [file mmc1.pdf]

**Cell Chemical Biology, Volume 24**

**Supplemental Information**

**A Linear Diubiquitin-Based Probe for Efficient  
and Selective Detection of the Deubiquitinating  
Enzyme OTULIN**

**Aurelia Weber, Paul R. Elliott, Adan Pinto-Fernandez, Sarah Bonham, Benedikt M. Kessler, David Komander, Farid El Oualid, and Daniel Krappmann**

## **SUPPLEMENTARY TABLES AND FIGURES**

### **A linear diubiquitin-based probe for efficient and selective detection of the deubiquitinating enzyme OTULIN**

Aurelia Weber, Paul R. Elliott, Adan Pinto-Fernandez, Sarah Bonham, Benedikt M. Kessler, David Komander, Farid El Oualid, and Daniel Krappmann

Values in parentheses are for the highest resolution shell.

---

| OTULIN 80-352-biotin-Ahx-Ub(1-75)-Dha-Ub              |                        |
|-------------------------------------------------------|------------------------|
| <hr/>                                                 |                        |
| Data collection                                       |                        |
| Beamline                                              | Diamond I04            |
| Space group                                           | $H 3_2$                |
| $a, b, c$ (Å)                                         | 101.14, 101.14, 277.92 |
| $\alpha, \beta, \gamma$ (°)                           | 90.00, 90.00, 120.00   |
| Wavelength                                            | 0.9795                 |
| Resolution (Å)                                        | 54.43-2.95 (3.13-2.95) |
| $R_{\text{merge}}$                                    | 5.9 (70.3)             |
| $\langle I / \sigma I \rangle$                        | 13.6 (2.0)             |
| CC(1/2)                                               | 0.99 (0.91)            |
| Completeness (%)                                      | 100 (100)              |
| Redundancy                                            | 6.4 (6.5)              |
|                                                       |                        |
| Refinement                                            |                        |
| Resolution (Å)                                        | 92.64-2.95             |
| No. reflections                                       | 11911                  |
| $R_{\text{work}} / R_{\text{free}}$                   | 0.22/0.32              |
| No. atoms                                             | 3104                   |
| Protein                                               | 3104                   |
| Ligand/ion                                            | -                      |
| Water                                                 | -                      |
| $B$ -factors                                          |                        |
| Wilson B                                              | 93.98                  |
| Protein                                               | 77.08                  |
| Ligand/ion                                            | -                      |
| Water                                                 | -                      |
| R.m.s deviations                                      |                        |
| Bond lengths (Å)                                      | 0.018                  |
| Bond angles (°)                                       | 1.955                  |
| Ramachandran statistics (outliers, allowed, favoured) |                        |
| <hr/>                                                 |                        |
| Dataset was collected from a single crystal.          |                        |

**Table S1 (related to Fig. 3):** Data collection and refinement statistics for crystallography.

| Protein IDs     | Protein names | LOG2 LFQ intensities |           |           |           |            |           |           |           |                      |           |           |           |                              |           |           |           | Significance difference No Probe_OTULIN-ABP (Student's T-test) |         |                  |          |        |        |
|-----------------|---------------|----------------------|-----------|-----------|-----------|------------|-----------|-----------|-----------|----------------------|-----------|-----------|-----------|------------------------------|-----------|-----------|-----------|----------------------------------------------------------------|---------|------------------|----------|--------|--------|
|                 |               | No Probe             |           |           |           | OTULIN-ABP |           |           |           | OTULIN-ABP + Apyrase |           |           |           | OTULIN-ABP + Apyrase + PR619 |           |           |           | N: -Log STT                                                    | N: STT  | N: STT statistic | MW [kDa] | Score  |        |
|                 |               | LFQ I 1_1            | LFQ I 1_2 | LFQ I 1_3 | LFQ I 1_4 | LFQ I 2_1  | LFQ I 2_2 | LFQ I 2_3 | LFQ I 2_4 | LFQ I 3_1            | LFQ I 3_2 | LFQ I 3_3 | LFQ I 3_4 | LFQ I 4_1                    | LFQ I 4_2 | LFQ I 4_3 | LFQ I 4_4 |                                                                |         |                  |          |        |        |
| P22314-2;P22314 | UBA1          | 17,7766              | 17,5063   | 17,5048   | 17,707    | 29,2205    | 29,5495   | 29,7971   | 30,1985   | 23,5485              | 21,5931   | 19,6165   | 20,4098   | 21,8335                      | 20,1046   | 20,6147   | 19,3192   | +                                                              | 8,63627 | -12,0677         | -5,4417  | 113,8  | 323,31 |
| Q96B8;H0Y9T0    | OTULIN        | 17,1191              | 16,7217   | 15,4617   | 16,6438   | 29,0197    | 29,4706   | 29,7409   | 29,2958   | 29,8383              | 29,3178   | 28,8216   | 28,1979   | 23,6984                      | 23,434    | 22,1332   | 22,3256   | +                                                              | 7,30689 | -12,8952         | -5,40014 | 40,262 | 308,75 |
| P15374;Q5TBK7   | UCHL3         | 17,7447              | 17,6595   | 15,7178   | 15,9059   | 24,2089    | 25,0379   | 24,8467   | 24,4435   | 25,0074              | 25,0494   | 24,3842   | 24,4533   | 25,1512                      | 25,7674   | 24,9247   | 24,739    | +                                                              | 5,01022 | -7,87727         | -3,05465 | 26,182 | 62,597 |
| A0AVT1;A0AVT1-2 | UBA6          | 18,5863              | 16,5304   | 17,4451   | 17,8637   | 22,7336    | 23,4294   | 24,0412   | 24,2625   | 17,2079              | 18,4227   | 17,7002   | 16,9856   | 18,042                       | 17,8221   | 17,6305   | 17,2594   | +                                                              | 4,4604  | -6,0103          | -2,35751 | 117,97 | 75,662 |
| F8VSA6;E9PS38   | NEDD8         | 17,8619              | 17,5603   | 15,351    | 15,947    | 22,6509    | 23,4459   | 24,6994   | 23,244    | 23,8412              | 23,2567   | 23,1742   | 23,0965   | 24,4478                      | 24,3355   | 24,1069   | 24,2666   | +                                                              | 4,0151  | -6,82999         | -2,48599 | 5,8668 | 21,287 |
| P45974-2;P45974 | USP5          | 17,798               | 20,1282   | 15,5395   | 20,1224   | 26,2123    | 27,7202   | 26,3578   | 26,3365   | 27,9555              | 26,4718   | 26,66     | 26,1792   | 26,3028                      | 26,0168   | 25,6588   | 25,687    | +                                                              | 3,42288 | -8,25972         | -2,61767 | 93,307 | 154,3  |
| F5H265;J3QS39   | UBC;UBB       | 23,6918              | 24,1324   | 16,9545   | 16,6629   | 29,8302    | 30,9425   | 31,9719   | 31,6184   | 30,5698              | 31,2093   | 30,1123   | 30,8753   | 30,7342                      | 30,8444   | 29,8138   | 31,1985   | +                                                              | 2,65046 | -10,7303         | -2,61282 | 16,841 | 323,31 |

**Table S2 (related to Fig. 6):** DUB enzymes identified as OTULIN ABP interactors by LC-MS/MS after biotin-PD. Perseus Label-free interaction data analysis workflow was performed using the following cutoff parameters: FDR = 0.01 and s0 = 2. LFQ intensities are given for each sample. Significance was calculated by Student's T test (STT).

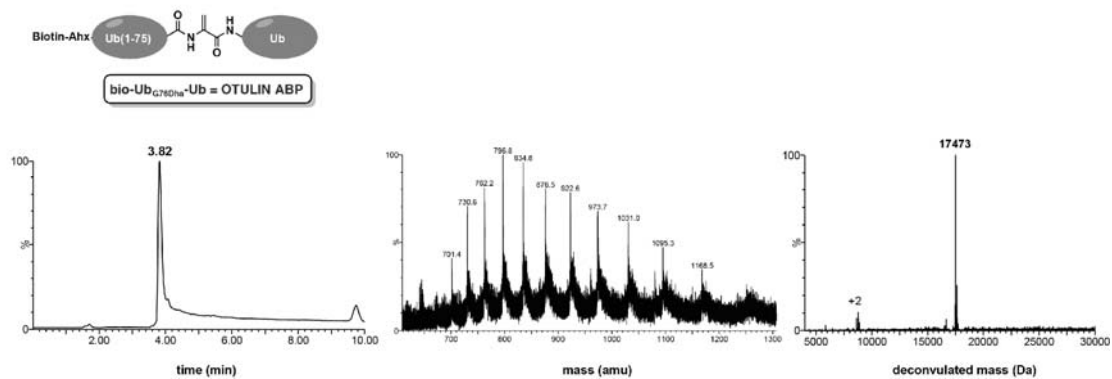

**Figure S1 (related to Fig. 1):** LC-MS analysis Biotin-Ahx-Ub(1-75)-Dha-Ub (bio-Ub<sub>G76Dha</sub>-Ub).

Mobile phase A = 1% CH<sub>3</sub>CN, 0.1% formic acid in water (milliQ) and B = 1% water (milliQ) and 0.1% formic acid in CH<sub>3</sub>CN. XBridge BEH300 C18 5μm 4.6x100mm; column T = 40°C, flow= 0.8 mL/min.

Gradient: 0 - 1.5 min: 5-30% B; 1.5 - 8 min: 30-50% B; 8 - 9.5 min: 50-95% B.

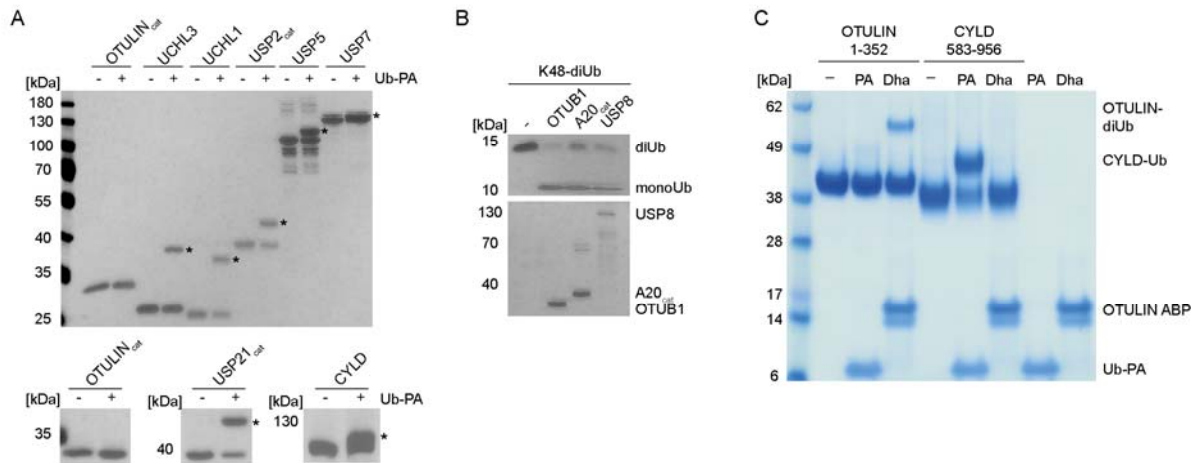

**Figure S2 (related to Figure 4):** Validation of DUB activities

A) Validation of DUB activities with Ub-PA probe. Recombinant DUBs (0.5  $\mu$ M) were incubated at 30°C with biotin-Ahx-Ub-PA probe (5  $\mu$ M) for 1 h. Labeling was monitored by Silver staining. Asterisks denote the DUB-Ub adducts.

B) Validation of DUB activities by K48-diUb cleavage assay. OTUB1, A20<sub>cat</sub> and USP8 (0.5  $\mu$ M) were incubated with 500 ng of K48-linked diUb at 30°C for 1 h before analyzing the diUb cleavage by Silver staining.

C) Direct comparison of OTULIN and CYLD labeling by OTULIN ABP and Ub-PA. Recombinant OTULIN (aa 1-352) or CYLD (aa 583-956), both at 30  $\mu$ M were mixed with equimolar Ub-PA (PA) or bio-Ub<sub>G76Dha</sub>-Ub (Dha) and incubated at RT for 1 h. Samples were resolved by SDS-PAGE and stained with Coomassie.

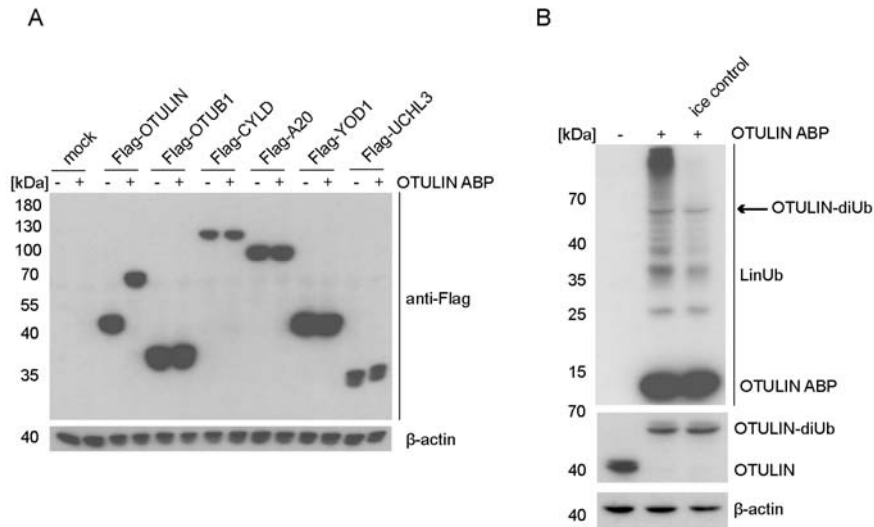

**Figure S3 (related to Fig. 5):** Labeling of overexpressed DUBs and induced Ub chain synthesis by OTULIN ABP.

A) Cross-reactivity of OTULIN ABP with transfected DUBs in HEK293 cells. Cell extracts from HEK293 cells overexpressing Flag-tagged DUBs ( $\sim 2.5 \times 10^5$  cells / reaction) were incubated with OTULIN ABP (30°C, 1 h). Labeling of DUBs was analyzed by Western Blot using anti-Flag antibody.

B) Temperature-dependent polyUb chain formation induced by OTULIN ABP. HEK293 cell extracts ( $\sim 2.5 \times 10^5$  cells / reaction) were mixed with 1  $\mu$ g OTULIN ABP and incubated for 30 min at 30°C. In the control lane, the enzymatic reaction was put on ice after an initial 2 min incubation at 30°C. Formation of the OTULIN-diUb adducts and linear ubiquitin chains were monitored by Western Blot.

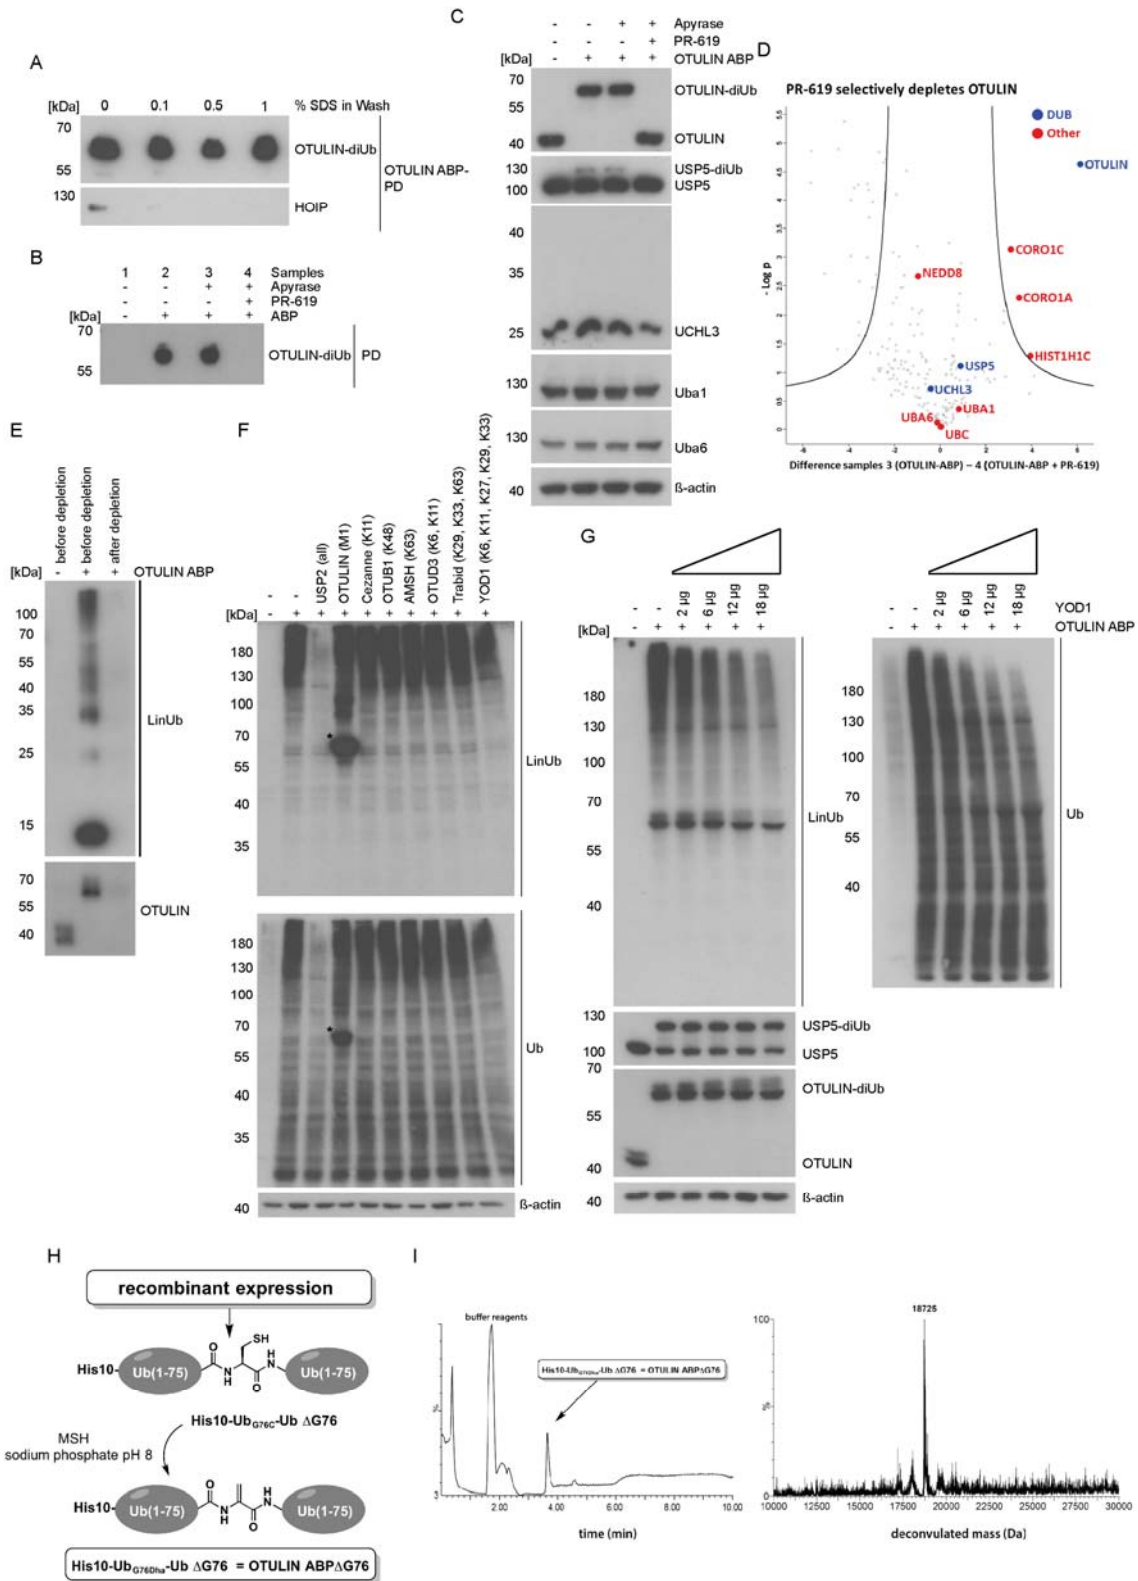

**Figure S4 (related to Fig. 6):** Specificity of probe labeling and auto-conjugation; synthesis of OTULIN ABPΔG76



A) Biotin-PD of OTULIN-diUb complex under high stringent washing conditions. 4  $\mu\text{g}$  of OTULIN ABP were incubated in extracts of Jurkat T cells ( $18 \times 10^6$  cells per reaction) for 15 min at RT. After PD, beads were washed twice with increasing SDS concentrations to enrich for covalent ABP interactors. Pull-down eluates were analyzed for OTULIN-diUb complex and HOIP by Western Blot.

B) Control of OTULIN-diUb pull-down in samples before LC-MS/MS analyses. Cell extracts of  $5 \times 10^7$  Jurkat T cells were subjected to treatments (as indicated; see Fig. 6A) and biotin-PD including 1% SDS washes was performed. PD of OTULIN-diUb complex was verified by analyzing 5% of the eluted material that was subsequently used for LC-MS/MS analyses.

C) OTULIN ABP labeling in extracts of Jurkat T cells. Extracts of Jurkat T cells were treated equivalent to LC-MS/MS (see Fig. 1A) and coupling of OTULIN ABP to DUBs and E1 enzymes in the extracts was determined by Western Blot.

D) Interactome analyses reveal selective depletion of OTULIN and HOIP from the OTULIN ABP by PR-619 treatment. Volcano plot demonstrates loss of binding of DUBs (blue) and other proteins (red) between control (sample 3) and PR-619 (sample 4) treatments before OTULIN ABP incubation and biotin-PD. Curves depict significant enrichment or depletion, respectively. Loss of COR1C, FHL2 and TPM3 is only associated with PR-619 treatment and not with specific OTULIN ABP interaction.

E) OTULIN ABP is auto-conjugated in cell extracts. Extracts of Jurkat T cells ( $6 \times 10^5$  cells / reaction) treated with 1  $\mu\text{g}$  OTULIN ABP (45 min,  $30^\circ\text{C}$ ) were subjected to biotin-PD. Depletion of Ub chains was demonstrated by comparing presence of Ub chains in the extracts before and after biotin-PD. Depletion of OTULIN-diUb adduct is shown as control.

F) OTULIN ABP induces generation of Ub chains that are prone to USP2 digestion. Linkage analyses of Ub chains formed in extracts of HEK293 cells after OTULIN ABP incubation (30 min at  $37^\circ\text{C}$ ) were performed by UbiCrest digestion. Treatment with linkage-specific DUBs was performed for another 30 min. Ubiquitin chains were detected by Western Blotting with anti-M1-polyUb or anti-Ub antibodies. Asterisk indicates formation OTULIN-diUb adduct by the OTULIN ABP.

G) High concentrations of YOD1 lead to partial digestion of OTULIN ABP induced Ub chains. Increasing YOD1 amounts were added (30 min) to extracts of HEK293 cells Ub chains were generate by OTULIN ABP incubation as in D. Formation of polyUb chains was detected by Western Blotting with anti-M1-polyUb or anti-Ub antibodies.

H) Chemical synthesis of His-Ub<sub>G76Dha</sub>-Ub <sub>$\Delta$ G76</sub> (OTULIN ABP $\Delta$ G76)

I) LC-MS analysis His-Ub(1-75)-Dha-Ub(1-75) (His-Ub<sub>G76Dha</sub>-Ub <sub>$\Delta$ G76</sub>)

Figure S5 (related to Fig. 7)

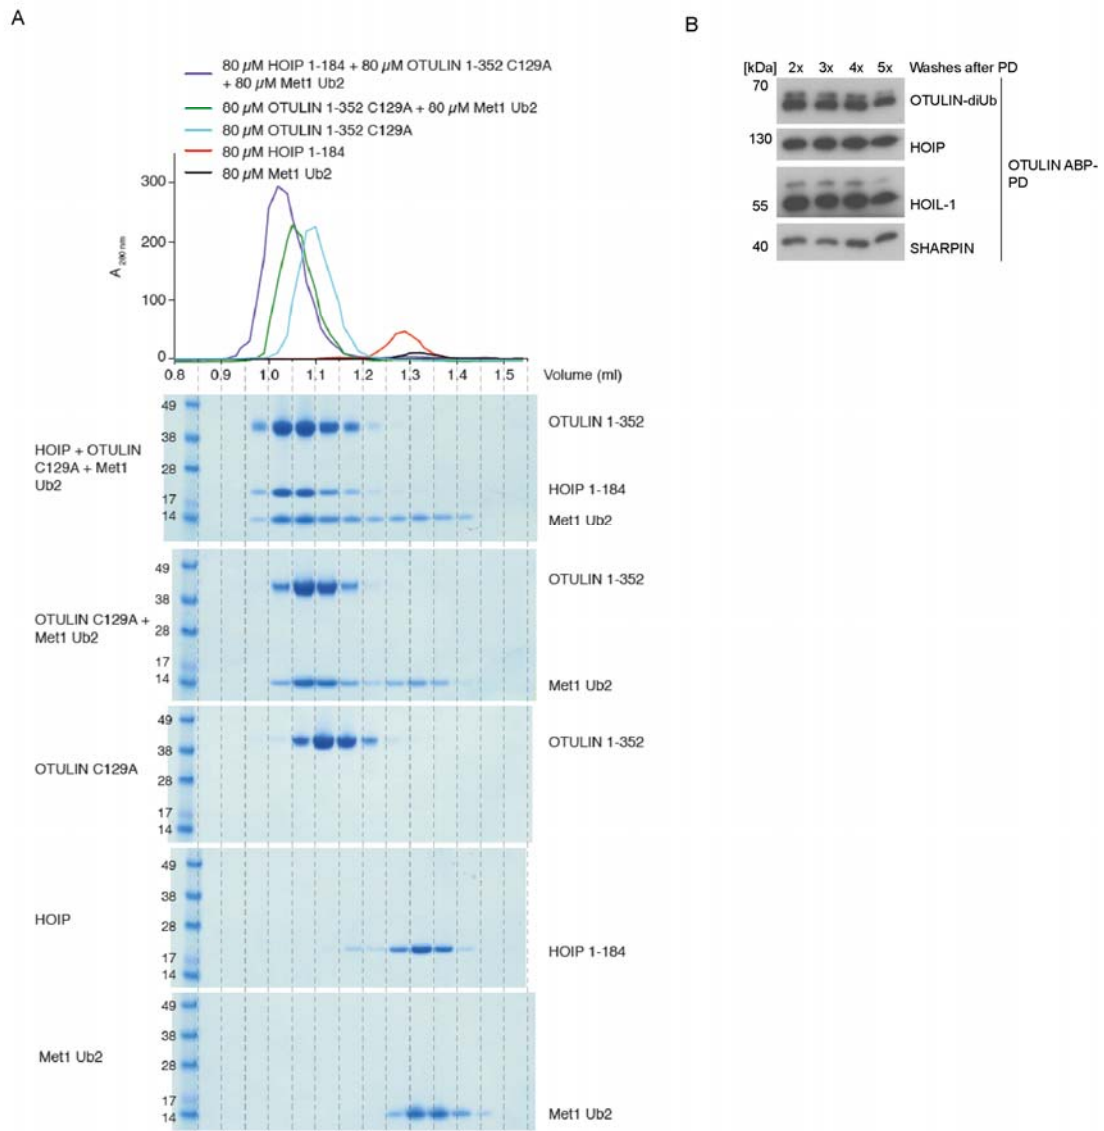

**Figure S5 (related to Fig. 7):** Data on stability of ternary OTULIN-diUb-LUBAC interaction *in vitro* and from cells

A) Size exclusion chromatography demonstrates ternary complex of HOIP, OTULIN and M1-linked diUb *in vitro*. Analytical size exclusion chromatography profiles for OTULIN (aa 1-352; C129A; cyan), HOIP PUB domain (aa 1-1184; red), M1-diUb (black curve), and the dimeric complex between OTULIN and M1-diUb (green curve) and trimeric complex between HOIP, OTULIN and M1-diUb (blue curve) at equimolar ratios. Coomassie-stained SDS-PAGE gels below show protein-containing fractions.

B) Stability of the OTULIN-diUb product bound to the cellular LUBAC in extracts. Extracts of Jurkat T cells were incubated with OTULIN ABP and biotin-PDs were performed as in Fig. 7C. Stability of the LUBAC association to the OTULIN-diUb product was monitored by analyzing successive (2x – 5x) washing steps of the pull-downs.
